# Supplementary material for: Secretory High-Mobility Group Box 1 Protein Affects Regulatory T Cell Differentiation in Neuroblastoma Microenvironment In Vitro
Source: J Oncol. 2018 Dec 16;2018:7946021. doi: 10.1155/2018/7946021 (PMC6311239; doi:10.1155/2018/7946021)
Supplement: Supplementary Materials — Supplementary Table 1: detailed information of protein identities, peptide sequences, and spot intensities of differentially expressed proteins between SK-N-SH and SK-N-AS secretomes. Supplementary Table 2: STRING with GO-term cellular component analysis of the significant proteins. Supplementary Table 3: panther protein classification of the significant proteins. Supplementary Table 4: GO-term biological process of the significant proteins using David functional annotation. Supplementary Table 5: detailed information of patient characteristics, clinical outcomes, and HMGB1 mRNA expression in 498 pediatric neuroblastomas adopted from the NCBI GEO database, accession GSE49711. [file 7946021.f1.xlsx]

## Sheet: Suppl table 1
Supplementary table 1. Detailed information of protein identities, peptide sequences and spot intensities of differentially expressed proteins between SK-N-SH vs. SK-N-AS secretomes.
Spot ID	Gene name	Protein name	SwissProt ID	Scores	% Cov	No. of distinct peptides	Peptide sequences	pI	MW (kDa)	SK-N-SH group							SK-N-AS group							Fold change (SH/AS)	p-value
										SH1	SH2	SH3	SH4	SH5	Mean	SEM	AS1	AS2	AS3	AS4	AS5	Mean	SEM
0	CCT6B	T-complex protein 1 subunit zeta-2	Q92526	81	2	1	QADLYISEGLHPR	6.85	58.35	0.199307	0.237094	0.24361	0.253576	0.290068	0.244731	0.0145887	0.0787001	0.0684448	0.114537	0.0829568	0.0495618	0.0788401	0.010622	3.10414	1.58542e-05
38	STMN1	Stathmin	P16949	154	9	2	ASGQAFELILSPR	5.76	17.29	0.595733	0.485503	0.597656	0.563492	0.65572	0.579621	0.0278337	0.191466	0.0762829	0.155634	0.146609	0.0847424	0.130947	0.0219549	4.42638	1.42729e-06
							RASGQAFELILSPR
53	GSTP1	Glutathione S-transferase	P09211	46	5	1	PPYTVVYFPVR	5.43	23.57	0.354746	0.377125	0.447287	0.405191	0.505784	0.418027	0.0268325	0.123644	0.0604925	0.105881	0.0851952	0.0987196	0.0947865	0.0105815	4.41019	3.60421e-06
65	UCHL1	Ubiquitin carboxyl-terminal hydrolase isozyme L1	P09936	237	21	3	LGVAGQWR	5.33	25.15	0.454787	0.372582	0.58768	0.455342	0.72206	0.51849	0.0614666	0.145072	0.0900129	0.175772	0.179864	0.132497	0.144644	0.0163427	3.58461	0.000370882
							NEAIQAAHDAVAQEGQCR
							VNFHFILFNNVDGHLYELDGR
67	TPI1	Triosephosphate isomerase	P60174	214	12	2	VPADTEVVCAPPTAYIDFAR	5.65	31.05	0.810118	0.610286	1.2968	1.11444	1.1284	0.992009	0.123549	0.177821	0.13766	0.23754	0.212564	0.242445	0.201606	0.0196647	4.92053	0.000228328
							VVLAYEPVWAIGTGK
72	YWHAE	14-3-3 protein epsilon	P62258	34	10	3	VFYYK	4.63	29.32	0.620065	0.715384	0.73753	0.69379	0.620801	0.677514	0.0243081	0.330331	0.0997485	0.185026	0.117952	0.105513	0.167714	0.0434215	4.0397	7.08468e-06
							YLAEFATGNDRK
							DSTLIMQLLR
75	PSMA8	Proteasome subunit alpha type-7-like	Q8TAA3	60	5	1	LTVEDPVTVEYITR	9.07	28.68	0.586018	0.86947	0.509669	0.646747	0.923397	0.70706	0.080756	0.237267	0.0491029	0.113639	0.0863534	0.108442	0.118961	0.0316849	5.94364	0.000140769
85	HMGB1	High mobility group protein B1	P09429	217	13	2	MSSYAFFVQTCR	5.62	25.04	0.377579	0.210113	0.270673	0.358038	0.554341	0.354149	0.0584618	0.0679887	0.0117253	0.0139606	0.0256858	0.0186224	0.0275966	0.0103768	12.8331	0.000573895
							RPPSAFFLFCSEYRPK
87	YWHAE	14-3-3 protein epsilon	P62258	158	11	3	YLAEFATGNDR	4.63	29.32	0.253444	0.356879	0.196039	0.228986	0.357647	0.278599	0.0333817	0.129362	0.0350492	0.0576392	0.0986137	0.0925004	0.0826329	0.0164701	3.37153	0.000760287
							YLAEFATGNDRK
							AASDIAMTELPPTHPIR
91	PSMA1	Proteasome subunit alpha type-1	P25786	227	17	3	NQYDNDVTVWSPQGR	6.15	29.82	0.0965734	0.107457	0.132749	0.11753	0.140771	0.119016	0.00806649	0.0479686	0.0234443	0.0287768	0.0311859	0.0420866	0.0346924	0.00449856	3.43061	1.66775e-05
							ILHVDNHIGISIAGLTADAR
							FVFDRPLPVSR
105	LDHA	L-lactate dehydrogenase A	P00338	115	11	3	LKGEMMDLQHGSLFLR	8.44	36.95	0.502135	0.462732	0.54052	0.613509	0.740698	0.571919	0.0489865	0.252558	0.0877407	0.151514	0.2194	0.177998	0.177842	0.028391	3.21588	0.000117221
							LVIITAGAR
							VIGSGCNLDSAR
110	MDH2	Malate dehydrogenase, mitochondrial	P40926	375	17	4	LTLYDIAHTPGVAADLSHIETK	8.92	35.9	0.811143	0.906963	0.889516	0.853798	1.00787	0.893858	0.0328907	0.294543	0.103309	0.223518	0.241672	0.223618	0.217332	0.0313313	4.11287	4.07287e-07
							GCDVVVIPAGVPR
							IFGVTTLDIVR
							VDFPQDQLTALTGR
123	C11orf54	Ester hydrolase C11orf54	Q9H0W9	36	2	1	LEHTHFFSR	6.23	35.6	0.198228	0.154091	0.116332	0.130497	0.130921	0.146014	0.0143895	0.0328739	0.0331875	0.044187	0.068259	0.0422384	0.0441492	0.00645068	3.30728	0.000196281
134	GOT2	Aspartate aminotransferase, mitochondrial	P00505	149	6	2	FVTVQTISGTGALR	9.14	47.88	0.262413	0.281355	0.344658	0.264362	0.257134	0.281984	0.0161857	0.137106	0.0605126	0.096046	0.0320484	0.0431506	0.0737727	0.0191855	3.82234	3.36183e-05
							IAAAILNTPDLR
135	SET	SET protein	Q01105	94	7	2	LRQPFFQK	4.23	33.47	0.404242	0.370552	0.37263	0.486536	0.403099	0.407412	0.0210448	0.111949	0.0809245	0.181717	0.142199	0.147132	0.132784	0.0170477	3.06822	7.65009e-06
							IDFYFDENPYFENK
154	ENO2	Gamma-enolase	P09104	371	12	4	FAGHNFR	4.91	47.58	0.15164	0.093992	0.136409	0.104705	0.17114	0.131577	0.0143629	0.0666317	0.0206954	0.0433995	0.0286426	0.0446243	0.0407987	0.00787609	3.22503	0.00054619
							IVIGMDVAASEFYR
							AAVPSGASTGIYEALELR
							YITGDQLGALYQDFVR
158	ENO1	Alpha-enolase	P06733	243	11	3	VVIGMDVAASEFFR	7.01	47.48	1.15141	0.986578	1.42801	1.82515	1.55663	1.38956	0.148027	0.336763	0.241874	0.454995	0.404999	0.429829	0.373692	0.0383936	3.71845	0.000161998
							AAVPSGASTGIYEALELR
							LAMQEFMILPVGAANFR
168	FKBP4	Peptidyl-prolyl cis-trans isomerase	Q02790	189	6	2	RGEAHLAVNDFELAR	5.35	52.05	0.180262	0.187158	0.22616	0.214289	0.223147	0.206203	0.00945096	0.053641	0.034192	0.0497193	0.087441	0.031233	0.0512453	0.0100237	4.02385	3.50543e-06
							FEIGEGENLDLPYGLER
180	CHGA	Chromogranin-A	P10645	215	7	2	EDSLEAGLPLQVR	4.58	50.82	0.508747	0.535467	0.45518	0.955618	0.690597	0.629122	0.0905251	1.51767	1.39527	3.417	2.29973	1.83272	2.09248	0.366148	0.300659	0.00467608
							RPEDQELESLSAIEAELEK
183	HSP90AA1	Heat shock protein HSP 90-alpha	P07900	393	9	5	RAPFDLFENR	4.94	85	0.622248	0.647849	1.1253	1.04848	1.22034	0.932843	0.124651	0.202918	0.04444	0.0573932	0.065619	0.132016	0.100477	0.0297492	9.28413	0.000189066
							HFSVEGQLEFR
							GVVDSEDLPLNISR
							HLEINPDHSIIETLR
							HNDDEQYAWESSAGGSFTVR
184	VCP	Transitional endoplasmic reticulum ATPase	P55072	128	2	1	ETVVEVPQVTWEDIGGLEDVKR	5.14	89.95	0.512694	0.334167	1.00948	0.564227	0.735191	0.631152	0.114164	0.161498	0.0904255	0.150228	0.123455	0.133693	0.13186	0.0122609	4.78653	0.00245034
205	B2M	Beta-2-microglobulin	P61769	261	37	2	SNFLNCYVSGFHPSDIEVDLLK	6.06	13.82	0.169576	0.184149	0.0483476	0.0774619	0.0483854	0.105584	0.0296698	0.888925	0.540644	0.976803	0.993194	0.845171	0.848947	0.0817978	0.12437	2.71335e-05
							DWSFYLLYYTEFTPTEKDEYACR
213	SPARC	SPARC	P09486	262	16	4	LEAGDHPVELLAR	4.73	35.46	0.423423	0.64941	0.365577	0.280237	0.255857	0.394901	0.0703311	2.45624	1.16591	2.35258	0.92234	2.1827	1.81595	0.320432	0.217462	0.00250629
							RLEAGDHPVELLAR
							YIPPCLDSELTEFPLR
							NVLVTLYERDEDNNLLTEK
223	GOT1	Aspartate aminotransferase, cytoplasmic	P17174	340	22	5	APPSVFAEVPQAQPVLVFK	6.52	46.44	0.136511	0.153372	0.19373	0.175242	0.157187	0.163208	0.00980341	0.057966	0.0266407	0.0387748	0.0395706	0.0412311	0.0408366	0.00500474	3.99662	3.82842e-06
							IANDNSLNHEYLPILGLAEFR
							NTPVYVSSPTWENHNAVFSAAGFK
							FLFPFFDSAYQGFASGNLER
							HIYLLPSGR
235	ASS1	Argininosuccinate synthase	P00966	213	11	3	EFVEEFIWPAIQSSALYEDR	8.08	46.78	0.0241478	0.0318893	0.0364988	0.0203044	0.0280256	0.0281732	0.00283962	0.0939401	0.121404	0.176616	0.200867	0.223312	0.163228	0.0242447	0.1726	0.000552094
							FAELVYTGFWHSPECEFVR
							GQVYILGR
237	IGFBP2	Insulin-like growth factor-binding protein 2	P18065	366	20	4	TPCQQELDQVLER	7.48	35.87	0.0418944	0.0554242	0.0570118	0.0533853	0.0325282	0.0480488	0.00470093	0.138304	0.085208	0.296339	0.263823	0.136027	0.18394	0.040707	0.26122	0.0105992
							GPLEHLYSLHIPNCDK
							GDPECHLFYNEQQEAR
							LAACGPPPVAPPAAVAAVAGGAR
241	HSPA4	Heat shock 70 kDa protein 4	P34932	185	3	2	EFSITDVVPYPISLR	5.11	95.12	0.0902852	0.10395	0.146376	0.114005	0.116835	0.11429	0.0092715	0.063335	0.0228272	0.0263827	0.0295875	0.0399326	0.036413	0.00731078	3.13872	0.000170133
							TSTVDLPIENQLLWQIDR
242	C7	Complement component C7	P10643	455	9	4	SVAVYGQYGGQPCVGNAFETQSCEPTR	6.09	96.65	0.278726	0.337201	0.382638	0.757879	0.29838	0.410965	0.0885312	0.600807	1.17173	1.7736	1.20431	1.4024	1.23057	0.190415	0.333963	0.00452505
							ELSHLPSLYDYSAYR
							LIDQYGTHYLQSGSLGGEYR
							NVVYTCNEGYSLIGNPVAR
258	DBH	Dopamine beta-hydroxylase	P09172	191	5	2	GQIHLDPQQDYQLLQVQR	5.97	69.87	0.190046	0.169732	0.261166	0.265352	0.262989	0.229857	0.0206613	0.106615	0.0349735	0.062889	0.0772813	0.0482049	0.0659927	0.0123811	3.48306	0.000137399
							AFYYPEEAGLAFGGPGSSR
259	FH	Fumarate hydratase	P07954	296	8	2	IYELAAGGTAVGTGLNTR	8.85	54.77	0.108161	0.114766	0.16694	0.0995281	0.125095	0.122898	0.0117771	0.0460077	0.0221322	0.0126653	0.034503	0.0326202	0.0295857	0.00567858	4.15397	9.83493e-05
							LLGDASVSFTENCVVGIQANTER

## Sheet: Suppl table 2
Supplementary table 2. STRING with GO-term cellular component analysis of the significant proteins.
Pathway ID	Pathway description	#Gene count	False discovery rate	Matching proteins
GO.0031988	membrane-bounded vesicle	23	1.1e-10	ASS1,C11orf54,C7,CHGA,DBH,ENO1,ENO2,FH,FKBP4,GOT1,GOT2,GSTP1,HSP90AA1,HSPA4,IGFBP2,LDHA,PSMA1,PSMA8,SPARC,STMN1,UCHL1,VCP,YWHAE
GO.0031982	vesicle	22	1.15e-09	ASS1,C11orf54,C7,CHGA,DBH,ENO1,ENO2,FH,FKBP4,GOT1,GOT2,GSTP1,HSP90AA1,HSPA4,LDHA,PSMA1,PSMA8,SPARC,STMN1,UCHL1,VCP,YWHAE
GO.0044421	extracellular region part	22	1.15e-09	ASS1,C11orf54,C7,ENO1,ENO2,FH,FKBP4,GOT1,GOT2,GSTP1,HMGB1,HSP90AA1,HSPA4,IGFBP2,LDHA,PSMA1,PSMA8,SPARC,STMN1,UCHL1,VCP,YWHAE
GO.0070062	extracellular exosome	20	1.15e-09	ASS1,C11orf54,C7,ENO1,ENO2,FH,FKBP4,GOT1,GOT2,GSTP1,HSP90AA1,HSPA4,IGFBP2,LDHA,PSMA1,PSMA8,STMN1,UCHL1,VCP,YWHAE
GO.0005576	extracellular region	23	2.38e-09	ASS1,C11orf54,C7,CHGA,DBH,ENO1,ENO2,FH,FKBP4,GOT1,GOT2,GSTP1,HMGB1,HSP90AA1,HSPA4,IGFBP2,LDHA,PSMA1,PSMA8,STMN1,UCHL1,VCP,YWHAE
GO.0005829	cytosol	16	7.93e-05	ASS1,CCT6B,FKBP4,GOT1,GSTP1,HSP90AA1,HSPA4,LDHA,PSMA1,PSMA8,SET,STMN1,TPI1,UCHL1,VCP,YWHAE
GO.0043209	myelin sheath	5	0.000405	ENO2,GOT2,HSP90AA1,UCHL1,VCP
GO.0000015	phosphopyruvate hydratase complex	2	0.00173	ENO1,ENO2
GO.0044433	cytoplasmic vesicle part	6	0.00849	B2M,CHGA,DBH,HSP90AA1,SPARC,YWHAE
GO.0019773	proteasome core complex, alpha-subunit complex	2	0.00874	PSMA1,PSMA8
GO.0030658	transport vesicle membrane	3	0.0147	B2M,CHGA,DBH
GO.0030659	cytoplasmic vesicle membrane	5	0.0168	B2M,CHGA,DBH,SPARC,YWHAE
GO.0043204	perikaryon	3	0.0168	ASS1,ENO2,GOT2
GO.0043234	protein complex	14	0.0168	B2M,C7,CCT6B,ENO1,ENO2,FH,FKBP4,GOT2,GSTP1,PSMA8,SET,STMN1,VCP,YWHAE
GO.0043025	neuronal cell body	5	0.0176	ASS1,ENO2,FKBP4,GOT2,UCHL1
GO.0060205	cytoplasmic membrane-bounded vesicle lumen	3	0.0176	DBH,HSP90AA1,SPARC
GO.0071682	endocytic vesicle lumen	2	0.0194	HSP90AA1,SPARC
GO.0097458	neuron part	7	0.0315	ASS1,ENO2,GOT1,GOT2,STMN1,UCHL1,YWHAE
GO.0031410	cytoplasmic vesicle	7	0.0334	B2M,CHGA,DBH,HSP90AA1,IGFBP2,SPARC,YWHAE
GO.0043005	neuron projection	6	0.0476	ASS1,FKBP4,GOT1,STMN1,UCHL1,YWHAE

## Sheet: Suppl table 3
Supplementary table 3. Panther protein classification of the significant proteins.
PANTHER Protein Class	Gene ID	Mapped ID	Gene name/ Gene symbol	PANTHER Family/Subfamily
Calcium-binding protein	HUMAN|HGNC=3720|UniProtKB=Q02790	Q02790	Peptidyl-prolyl cis-trans isomerase FKBP4	PEPTIDYL-PROLYL CIS-TRANS ISOMERASE FKBP4 (PTHR10516:SF25)
			FKBP4
Cell adhesion molecule	HUMAN|HGNC=11219|UniProtKB=P09486	P09486	SPARC	SPARC (PTHR13866:SF6)
			SPARC
Chaperone	HUMAN|HGNC=1621|UniProtKB=Q92526	Q92526	T-complex protein 1 subunit zeta-2	T-COMPLEX PROTEIN 1 SUBUNIT ZETA-2 (PTHR11353:SF58)
			CCT6B
	HUMAN|HGNC=3720|UniProtKB=Q02790	Q02790	Peptidyl-prolyl cis-trans isomerase FKBP4	PEPTIDYL-PROLYL CIS-TRANS ISOMERASE FKBP4 (PTHR10516:SF25)
			FKBP4
	HUMAN|HGNC=12851|UniProtKB=P62258	P62258	14-3-3 protein epsilon	14-3-3 PROTEIN EPSILON (PTHR18860:SF67)
			YWHAE
	HUMAN|HGNC=10760|UniProtKB=Q01105	Q01105	Protein SET	PROTEIN SET (PTHR11875:SF67)
			SET
	HUMAN|HGNC=5253|UniProtKB=P07900	P07900	Heat shock protein HSP 90-alpha	HEAT SHOCK PROTEIN HSP 90-ALPHA-RELATED (PTHR11528:SF34)
			HSP90AA1
Defense/immunity protein	HUMAN|HGNC=914|UniProtKB=P61769	P61769	Beta-2-microglobulin	BETA-2-MICROGLOBULIN (PTHR19944:SF62)
			B2M
Enzyme modulator	HUMAN|HGNC=10760|UniProtKB=Q01105	Q01105	Protein SET	PROTEIN SET (PTHR11875:SF67)
			SET
	HUMAN|HGNC=5471|UniProtKB=P18065	P18065	Insulin-like growth factor-binding protein 2	INSULIN-LIKE GROWTH FACTOR-BINDING PROTEIN 2 (PTHR11551:SF5)
			IGFBP2
Extracellular matrix protein	HUMAN|HGNC=11219|UniProtKB=P09486	P09486	SPARC	SPARC (PTHR13866:SF6)
			SPARC
Hydrolase	HUMAN|HGNC=9530|UniProtKB=P25786	P25786	Proteasome subunit alpha type-1	PROTEASOME SUBUNIT ALPHA TYPE-RELATED (PTHR11599:SF12)
			PSMA1
	HUMAN|HGNC=22985|UniProtKB=Q8TAA3	Q8TAA3	Proteasome subunit alpha type-7-like	PROTEASOME SUBUNIT ALPHA TYPE-7-LIKE (PTHR11599:SF15)
			PSMA8
	HUMAN|HGNC=12513|UniProtKB=P09936	P09936	Ubiquitin carboxyl-terminal hydrolase isozyme L1	UBIQUITIN CARBOXYL-TERMINAL HYDROLASE ISOZYME L1 (PTHR10589:SF19)
			UCHL1
Isomerase	HUMAN|HGNC=12009|UniProtKB=P60174	P60174	Triosephosphate isomerase	TRIOSEPHOSPHATE ISOMERASE (PTHR21139:SF15)
			TPI1
	HUMAN|HGNC=3720|UniProtKB=Q02790	Q02790	Peptidyl-prolyl cis-trans isomerase FKBP4	PEPTIDYL-PROLYL CIS-TRANS ISOMERASE FKBP4 (PTHR10516:SF25)
			FKBP4
Ligase	HUMAN|HGNC=758|UniProtKB=P00966	P00966	Argininosuccinate synthase	ARGININOSUCCINATE SYNTHASE (PTHR11587:SF2)
			ASS1
Lyase	HUMAN|HGNC=3700|UniProtKB=P07954	P07954	Fumarate hydratase, mitochondrial	FUMARATE HYDRATASE, MITOCHONDRIAL (PTHR11444:SF1)
			FH
	HUMAN|HGNC=3353|UniProtKB=P09104	P09104	Gamma-enolase	GAMMA-ENOLASE (PTHR11902:SF10)
			ENO2
	HUMAN|HGNC=3350|UniProtKB=P06733	P06733	Alpha-enolase	ALPHA-ENOLASE (PTHR11902:SF12)
			ENO1
Nucleic acid binding	HUMAN|HGNC=4983|UniProtKB=P09429	P09429	High mobility group protein B1	HIGH MOBILITY GROUP PROTEIN B1 (PTHR13711:SF164)
			HMGB1
Oxidoreductase	HUMAN|HGNC=6535|UniProtKB=P00338	P00338	L-lactate dehydrogenase A chain	L-LACTATE DEHYDROGENASE A CHAIN (PTHR43128:SF10)
			LDHA
	HUMAN|HGNC=6971|UniProtKB=P40926	P40926	Malate dehydrogenase, mitochondrial	MALATE DEHYDROGENASE, MITOCHONDRIAL (PTHR11540:SF16)
			MDH2
Signaling molecule	HUMAN|HGNC=11219|UniProtKB=P09486	P09486	SPARC	SPARC (PTHR13866:SF6)
			SPARC
	HUMAN|HGNC=4983|UniProtKB=P09429	P09429	High mobility group protein B1	HIGH MOBILITY GROUP PROTEIN B1 (PTHR13711:SF164)
			HMGB1
Transcription factor	HUMAN|HGNC=4983|UniProtKB=P09429	P09429	High mobility group protein B1	HIGH MOBILITY GROUP PROTEIN B1 (PTHR13711:SF164)
			HMGB1
unmatched	HUMAN|HGNC=5237|UniProtKB=P34932	P34932	Heat shock 70 kDa protein 4	HEAT SHOCK 70 KDA PROTEIN 4 (PTHR45639:SF6)
			HSPA4
	HUMAN|HGNC=4432|UniProtKB=P17174	P17174	Aspartate aminotransferase, cytoplasmic	ASPARTATE AMINOTRANSFERASE, CYTOPLASMIC (PTHR11879:SF3)
			GOT1
	HUMAN|HGNC=1929|UniProtKB=P10645	P10645	Chromogranin-A	CHROMOGRANIN-A (PTHR10583:SF1)
			CHGA
	HUMAN|HGNC=4638|UniProtKB=P09211	P09211	Glutathione S-transferase P	GLUTATHIONE S-TRANSFERASE P (PTHR11571:SF214)
			GSTP1
	HUMAN|HGNC=30204|UniProtKB=Q9H0W9	Q9H0W9	Ester hydrolase C11orf54	ESTER HYDROLASE C11ORF54 (PTHR13204:SF1)
			C11orf54
	HUMAN|HGNC=2689|UniProtKB=P09172	P09172	Dopamine beta-hydroxylase	DOPAMINE BETA-HYDROXYLASE (PTHR10157:SF29)
			DBH
	HUMAN|HGNC=6510|UniProtKB=P16949	P16949	Stathmin	STATHMIN (PTHR10104:SF5)
			STMN1
	HUMAN|HGNC=12666|UniProtKB=P55072	P55072	Transitional endoplasmic reticulum ATPase	TRANSITIONAL ENDOPLASMIC RETICULUM ATPASE (PTHR23077:SF69)
			VCP
	HUMAN|HGNC=1346|UniProtKB=P10643	P10643	Complement component C7	COMPLEMENT COMPONENT C7 (PTHR45742:SF2)
			C7
	HUMAN|HGNC=4433|UniProtKB=P00505	P00505	Aspartate aminotransferase, mitochondrial	ASPARTATE AMINOTRANSFERASE, MITOCHONDRIAL (PTHR11879:SF10)
			GOT2

## Sheet: Suppl table 4
Supplementary table 4. GO-term biological process of the significant proteins using David functional annotation.
UniProt ID	Protein name (gene name)	GO-term biological process
P09429	high mobility group box 1(HMGB1)	GO:0000122~negative regulation of transcription from RNA polymerase II promoter,GO:0001654~eye development,GO:0001773~myeloid dendritic cell activation,GO:0001935~endothelial cell proliferation,GO:0002218~activation of innate immune response,GO:0002270~plasmacytoid dendritic cell activation,GO:0002281~macrophage activation involved in immune response,GO:0002407~dendritic cell chemotaxis,GO:000243…
Q02790	FK506 binding protein 4(FKBP4)	GO:0000413~protein peptidyl-prolyl isomerization,GO:0006457~protein folding,GO:0006463~steroid hormone receptor complex assembly,GO:0006825~copper ion transport,GO:0007566~embryo implantation,GO:0010977~negative regulation of neuron projection development,GO:0030521~androgen receptor signaling pathway,GO:0030850~prostate gland development,GO:0031111~negative regulation of microtubule polymerizati…
Q01105	SET nuclear proto-oncogene(SET)	GO:0006260~DNA replication,GO:0006334~nucleosome assembly,GO:0006337~nucleosome disassembly,GO:0006913~nucleocytoplasmic transport,GO:0016032~viral process,GO:0035067~negative regulation of histone acetylation,GO:0043086~negative regulation of catalytic activity,GO:0043488~regulation of mRNA stability,GO:0043524~negative regulation of neuron apoptotic process,GO:0045892~negative regulation of tra…
P00966	argininosuccinate synthase 1(ASS1)	GO:0000050~urea cycle,GO:0000052~citrulline metabolic process,GO:0000053~argininosuccinate metabolic process,GO:0001822~kidney development,GO:0001889~liver development,GO:0006526~arginine biosynthetic process,GO:0006531~aspartate metabolic process,GO:0006953~acute-phase response,GO:0007494~midgut development,GO:0007568~aging,GO:0007584~response to nutrient,GO:0010043~response to zinc ion,GO:00100…
P61769	beta-2-microglobulin(B2M)	GO:0001895~retina homeostasis,GO:0001916~positive regulation of T cell mediated cytotoxicity,GO:0002474~antigen processing and presentation of peptide antigen via MHC class I,GO:0002479~antigen processing and presentation of exogenous peptide antigen via MHC class I, TAP-dependent,GO:0002480~antigen processing and presentation of exogenous peptide antigen via MHC class I, TAP-independent,GO:00024…
Q92526	chaperonin containing TCP1 subunit 6B(CCT6B)	GO:0006457~protein folding,GO:0007283~spermatogenesis,GO:0015031~protein transport,GO:0051131~chaperone-mediated protein complex assembly,GO:1901998~toxin transport,
P10645	chromogranin A(CHGA)	GO:0002026~regulation of the force of heart contraction,GO:0002551~mast cell chemotaxis,GO:0006996~organelle organization,GO:0008217~regulation of blood pressure,GO:0030816~positive regulation of cAMP metabolic process,GO:0031640~killing of cells of other organism,GO:0032762~mast cell cytokine production,GO:0033604~negative regulation of catecholamine secretion,GO:0043303~mast cell degranulation,…
Q9H0W9	chromosome 11 open reading frame 54(C11orf54)
P10643	complement C7(C7)	GO:0006955~immune response,GO:0006956~complement activation,GO:0006957~complement activation, alternative pathway,GO:0006958~complement activation, classical pathway,GO:0019835~cytolysis,GO:0030449~regulation of complement activation,
P09172	dopamine beta-hydroxylase(DBH)	GO:0001816~cytokine production,GO:0001974~blood vessel remodeling,GO:0001975~response to amphetamine,GO:0002443~leukocyte mediated immunity,GO:0006589~octopamine biosynthetic process,GO:0007268~chemical synaptic transmission,GO:0007613~memory,GO:0007626~locomotory behavior,GO:0008542~visual learning,GO:0042127~regulation of cell proliferation,GO:0042309~homoiothermy,GO:0042420~dopamine catabolic …
P06733	enolase 1(ENO1)	GO:0006094~gluconeogenesis,GO:0006096~glycolytic process,GO:0006351~transcription, DNA-templated,GO:0009615~response to virus,GO:0030308~negative regulation of cell growth,GO:0045892~negative regulation of transcription, DNA-templated,GO:0061621~canonical glycolysis,GO:0098609~cell-cell adhesion,
P09104	enolase 2(ENO2)	GO:0006094~gluconeogenesis,GO:0006096~glycolytic process,GO:0061621~canonical glycolysis,
P07954	fumarate hydratase(FH)	GO:0006099~tricarboxylic acid cycle,GO:0006106~fumarate metabolic process,GO:0006108~malate metabolic process,GO:0048873~homeostasis of number of cells within a tissue,GO:0051262~protein tetramerization,
P17174	glutamic-oxaloacetic transaminase 1(GOT1)	GO:0006094~gluconeogenesis,GO:0006103~2-oxoglutarate metabolic process,GO:0006107~oxaloacetate metabolic process,GO:0006114~glycerol biosynthetic process,GO:0006531~aspartate metabolic process,GO:0006532~aspartate biosynthetic process,GO:0006533~aspartate catabolic process,GO:0006536~glutamate metabolic process,GO:0007219~Notch signaling pathway,GO:0008652~cellular amino acid biosynthetic process…
P00505	glutamic-oxaloacetic transaminase 2(GOT2)	GO:0006094~gluconeogenesis,GO:0006103~2-oxoglutarate metabolic process,GO:0006107~oxaloacetate metabolic process,GO:0006520~cellular amino acid metabolic process,GO:0006531~aspartate metabolic process,GO:0006532~aspartate biosynthetic process,GO:0006533~aspartate catabolic process,GO:0006536~glutamate metabolic process,GO:0008652~cellular amino acid biosynthetic process,GO:0009058~biosynthetic pr…
P09211	glutathione S-transferase pi 1(GSTP1)	GO:0000302~response to reactive oxygen species,GO:0002674~negative regulation of acute inflammatory response,GO:0006469~negative regulation of protein kinase activity,GO:0006749~glutathione metabolic process,GO:0006805~xenobiotic metabolic process,GO:0007417~central nervous system development,GO:0008152~metabolic process,GO:0009636~response to toxic substance,GO:0009890~negative regulation of bio…
P07900	heat shock protein 90 alpha family class A member 1(HSP90AA1)	GO:0000086~G2/M transition of mitotic cell cycle,GO:0001764~neuron migration,GO:0003009~skeletal muscle contraction,GO:0006457~protein folding,GO:0006839~mitochondrial transport,GO:0006898~receptor-mediated endocytosis,GO:0006950~response to stress,GO:0006986~response to unfolded protein,GO:0007165~signal transduction,GO:0009408~response to heat,GO:0009409~response to cold,GO:0009651~response to …
P34932	heat shock protein family A (Hsp70) member 4(HSPA4)	GO:0006986~response to unfolded protein,GO:0045040~protein import into mitochondrial outer membrane,GO:0051131~chaperone-mediated protein complex assembly,
P18065	insulin like growth factor binding protein 2(IGFBP2)	GO:0001558~regulation of cell growth,GO:0007165~signal transduction,GO:0007565~female pregnancy,GO:0007568~aging,GO:0007584~response to nutrient,GO:0009612~response to mechanical stimulus,GO:0010226~response to lithium ion,GO:0032355~response to estradiol,GO:0032526~response to retinoic acid,GO:0032868~response to insulin,GO:0032870~cellular response to hormone stimulus,GO:0042104~positive regula…
P00338	lactate dehydrogenase A(LDHA)	GO:0001666~response to hypoxia,GO:0005975~carbohydrate metabolic process,GO:0006089~lactate metabolic process,GO:0006090~pyruvate metabolic process,GO:0006096~glycolytic process,GO:0007584~response to nutrient,GO:0009749~response to glucose,GO:0019674~NAD metabolic process,GO:0019752~carboxylic acid metabolic process,GO:0021762~substantia nigra development,GO:0042493~response to drug,GO:0042542~r…
P40926	malate dehydrogenase 2(MDH2)	GO:0005975~carbohydrate metabolic process,GO:0006094~gluconeogenesis,GO:0006099~tricarboxylic acid cycle,GO:0006107~oxaloacetate metabolic process,GO:0006108~malate metabolic process,GO:0006475~internal protein amino acid acetylation,GO:0006734~NADH metabolic process,
P25786	proteasome subunit alpha 1(PSMA1)	GO:0000165~MAPK cascade,GO:0000209~protein polyubiquitination,GO:0002223~stimulatory C-type lectin receptor signaling pathway,GO:0002479~antigen processing and presentation of exogenous peptide antigen via MHC class I, TAP-dependent,GO:0002862~negative regulation of inflammatory response to antigenic stimulus,GO:0006511~ubiquitin-dependent protein catabolic process,GO:0006521~regulation of cellul…
Q8TAA3	proteasome subunit alpha 8(PSMA8)	GO:0000165~MAPK cascade,GO:0000209~protein polyubiquitination,GO:0002223~stimulatory C-type lectin receptor signaling pathway,GO:0002479~antigen processing and presentation of exogenous peptide antigen via MHC class I, TAP-dependent,GO:0006511~ubiquitin-dependent protein catabolic process,GO:0006521~regulation of cellular amino acid metabolic process,GO:0031145~anaphase-promoting complex-dependen…
P09486	secreted protein acidic and cysteine rich(SPARC)	GO:0001503~ossification,GO:0001937~negative regulation of endothelial cell proliferation,GO:0002576~platelet degranulation,GO:0006898~receptor-mediated endocytosis,GO:0007165~signal transduction,GO:0007507~heart development,GO:0009629~response to gravity,GO:0010288~response to lead ion,GO:0010595~positive regulation of endothelial cell migration,GO:0016525~negative regulation of angiogenesis,GO:0…
P16949	stathmin 1(STMN1)	GO:0000281~mitotic cytokinesis,GO:0007019~microtubule depolymerization,GO:0007052~mitotic spindle organization,GO:0007165~signal transduction,GO:0007409~axonogenesis,GO:0007420~brain development,GO:0009615~response to virus,GO:0031110~regulation of microtubule polymerization or depolymerization,GO:0031115~negative regulation of microtubule polymerization,GO:0031175~neuron projection development,G…
P60174	triosephosphate isomerase 1(TPI1)	GO:0006094~gluconeogenesis,GO:0006096~glycolytic process,GO:0006098~pentose-phosphate shunt,GO:0007275~multicellular organism development,GO:0019563~glycerol catabolic process,GO:0046166~glyceraldehyde-3-phosphate biosynthetic process,GO:0061621~canonical glycolysis,
P62258	tyrosine 3-monooxygenase/tryptophan 5-monooxygenase activation protein epsilon(YWHAE)	GO:0000086~G2/M transition of mitotic cell cycle,GO:0001764~neuron migration,GO:0003064~regulation of heart rate by hormone,GO:0006605~protein targeting,GO:0016032~viral process,GO:0021762~substantia nigra development,GO:0021766~hippocampus development,GO:0021987~cerebral cortex development,GO:0035308~negative regulation of protein dephosphorylation,GO:0035329~hippo signaling,GO:0035556~intracell…
P09936	ubiquitin C-terminal hydrolase L1(UCHL1)	GO:0002931~response to ischemia,GO:0006511~ubiquitin-dependent protein catabolic process,GO:0007412~axon target recognition,GO:0007628~adult walking behavior,GO:0008283~cell proliferation,GO:0016241~regulation of macroautophagy,GO:0016579~protein deubiquitination,GO:0019233~sensory perception of pain,GO:0019896~axonal transport of mitochondrion,GO:0021762~substantia nigra development,GO:0042755~e…
P55072	valosin containing protein(VCP)	GO:0006281~DNA repair,GO:0006302~double-strand break repair,GO:0006511~ubiquitin-dependent protein catabolic process,GO:0006734~NADH metabolic process,GO:0006888~ER to Golgi vesicle-mediated transport,GO:0006914~autophagy,GO:0006919~activation of cysteine-type endopeptidase activity involved in apoptotic process,GO:0006974~cellular response to DNA damage stimulus,GO:0010918~positive regulation of…

## Sheet: Suppl table 5
Supplementary table 5. Patient characteristics, clinical outcomes and HMGB1 mRNA expression in 498 pediatric neuroblastomas adopted from the MAQC-III/SEQC study.
NB ID	Age at diagnosis (day)	Gender	INSS Stage	High Risk (1=yes, 0=no)	MYCN status	OS (The Occurrence of Death from Disease) (1=yes, 0=no)	EFS (The Occurrence of Events including Progression, Relapse or Death) (1=yes, 0=no)	HMGB1 mRNA expression (z-Score)	HMGB1 status
NB001	987	M	4	1	Non-Amp	1	1	0.14659	Unchange
NB002	1808	M	4	1	Non-Amp	1	1	0.847406	Unchange
NB003	625	F	4	1	Amp	1	1	0.730604	Unchange
NB004	335	F	2b	1	Amp	0	0	0.310114	Unchange
NB005	536	F	4	1	Amp	1	1	0.613801	Unchange
NB006	147	M	4S	0	Non-Amp	0	0	-0.110376	Unchange
NB007	942	M	4	1	Non-Amp	0	1	-0.297261	Unchange
NB008	1652	M	3	1	Amp	0	0	1.01093	Unchange
NB009	217	F	4S	1	Amp	0	0	0.800685	Unchange
NB010	379	M	3	1	Amp	1	1	0.403556	Unchange
NB011	414	M	2a	0	Non-Amp	0	0	-1.11488	Unchange
NB012	380	M	1	0	Non-Amp	0	0	-0.343982	Unchange
NB013	3394	M	4	1	Non-Amp	1	1	-0.367342	Unchange
NB014	515	F	2b	0	Non-Amp	0	0	-1.62881	Down
NB015	4785	M	4	1	Non-Amp	0	1	-0.367342	Unchange
NB016	0	F	4S	0	Non-Amp	0	0	-1.06816	Unchange
NB017	765	M	2b	0	Non-Amp	0	0	-0.741111	Unchange
NB018	507	M	2b	0	Non-Amp	0	0	0.800685	Unchange
NB019	303	F	1	0	Non-Amp	0	0	0.380195	Unchange
NB020	497	M	1	0	Non-Amp	0	0	-0.437424	Unchange
NB021	564	F	1	0	Non-Amp	0	0	-1.69889	Down
NB022	401	M	1	0	Non-Amp	0	0	-0.460784	Unchange
NB023	420	M	1	0	Non-Amp	0	0	-0.157097	Unchange
NB024	499	F	1	0	Non-Amp	0	0	-1.34849	Down
NB025	496	M	1	0	Non-Amp	0	0	-1.34849	Down
NB026	488	F	1	0	Non-Amp	0	0	-0.600948	Unchange
NB027	440	F	1	0	Non-Amp	0	0	-0.577587	Unchange
NB028	468	F	1	0	Non-Amp	0	0	0.310114	Unchange
NB029	463	M	1	0	Non-Amp	0	0	-0.530866	Unchange
NB030	450	M	1	0	Non-Amp	0	0	0.450277	Unchange
NB031	494	F	1	0	Non-Amp	0	0	-0.69439	Unchange
NB032	398	F	1	0	Non-Amp	0	0	-0.414063	Unchange
NB033	479	F	1	0	Non-Amp	0	0	0.660522	Unchange
NB034	467	F	1	0	Non-Amp	0	0	-1.06816	Unchange
NB035	173	M	1	0	Non-Amp	0	0	-0.834553	Unchange
NB036	744	M	1	0	Non-Amp	0	0	-1.13824	Unchange
NB037	446	F	1	0	Non-Amp	0	0	-0.203818	Unchange
NB038	466	F	1	0	Non-Amp	0	0	-1.11488	Unchange
NB039	705	F	2a	0	Non-Amp	0	0	-0.180458	Unchange
NB040	971	M	2a	0	Non-Amp	0	0	-0.157097	Unchange
NB041	472	F	2b	0	Non-Amp	0	0	0.543719	Unchange
NB042	975	F	2a	0	Non-Amp	0	0	-0.834553	Unchange
NB043	458	M	2b	0	Non-Amp	0	0	-0.0169341	Unchange
NB044	528	F	2a	0	Non-Amp	0	0	-2.21283	Down
NB045	867	F	2a	0	Non-Amp	0	0	0.216671	Unchange
NB046	480	F	2a	0	Non-Amp	0	0	-0.133737	Unchange
NB047	381	F	2b	0	Non-Amp	0	0	-1.51201	Down
NB048	715	M	2b	0	Non-Amp	0	0	-1.25504	Down
NB049	638	F	2b	0	Non-Amp	0	0	-0.811193	Unchange
NB050	546	F	1	0	Non-Amp	0	0	-1.32512	Down
NB051	46	M	4S	0	Non-Amp	0	0	0.310114	Unchange
NB052	1016	F	1	0	Non-Amp	0	0	-0.671029	Unchange
NB053	10	M	1	0	Non-Amp	0	0	1.31462	Up
NB054	824	F	1	0	Non-Amp	0	0	0.403556	Unchange
NB055	94	F	1	0	Non-Amp	0	0	0.193311	Unchange
NB056	405	M	1	0	Non-Amp	0	0	0.473637	Unchange
NB057	449	M	1	0	Non-Amp	0	0	-0.157097	Unchange
NB058	743	F	1	0	Non-Amp	0	0	-0.530866	Unchange
NB059	546	F	1	0	Non-Amp	0	0	0.0998687	Unchange
NB060	470	M	1	0	Non-Amp	0	0	-0.180458	Unchange
NB061	442	M	2b	0	Non-Amp	0	0	0.637161	Unchange
NB062	408	F	2b	0	Non-Amp	0	0	-0.133737	Unchange
NB063	472	F	2b	0	Non-Amp	0	1	-0.414063	Unchange
NB064	91	M	2b	0	Non-Amp	0	0	-0.0402946	Unchange
NB065	417	M	2a	0	Non-Amp	0	0	-0.624308	Unchange
NB066	453	F	2a	0	Non-Amp	0	1	0.216671	Unchange
NB067	243	M	3	0	Non-Amp	0	0	-0.0870157	Unchange
NB068	541	F	3	0	Non-Amp	0	0	-0.530866	Unchange
NB069	1585	F	3	0	Non-Amp	1	1	0.450277	Unchange
NB070	379	F	3	0	Non-Amp	0	0	-0.227179	Unchange
NB071	0	F	3	0	Non-Amp	0	0	-0.157097	Unchange
NB072	202	M	3	0	Non-Amp	0	0	1.10437	Unchange
NB073	344	F	3	0	Non-Amp	0	0	0.029787	Unchange
NB074	1126	M	3	0	Non-Amp	0	1	-0.0870157	Unchange
NB075	461	F	3	0	Non-Amp	0	0	1.05765	Unchange
NB076	451	M	3	0	Non-Amp	0	0	-0.110376	Unchange
NB077	66	M	3	0	Non-Amp	0	0	-0.390703	Unchange
NB078	1381	M	3	0	Non-Amp	0	0	-0.180458	Unchange
NB079	452	M	3	0	Non-Amp	0	0	-0.157097	Unchange
NB080	1000	F	3	1	Amp	1	1	0.450277	Unchange
NB081	2737	M	3	1	Amp	0	0	0.496998	Unchange
NB082	1012	M	4	1	Non-Amp	0	0	-0.133737	Unchange
NB083	1262	M	4	1	Non-Amp	0	0	0.777325	Unchange
NB084	495	F	4	0	Non-Amp	0	0	-0.881274	Unchange
NB085	321	F	4	0	Non-Amp	0	0	-1.06816	Unchange
NB086	359	F	4	0	Non-Amp	0	1	0.14659	Unchange
NB087	1602	M	4	1	Non-Amp	0	1	-0.974717	Unchange
NB088	400	F	4	0	Non-Amp	0	0	0.870767	Unchange
NB089	395	M	4	0	Non-Amp	0	0	-0.297261	Unchange
NB090	5465	F	4	1	Non-Amp	1	1	0.16995	Unchange
NB091	2429	M	4	1	Non-Amp	0	1	-0.577587	Unchange
NB092	933	M	4	1	Non-Amp	1	1	-0.157097	Unchange
NB093	366	M	4	0	Non-Amp	0	0	-0.764472	Unchange
NB094	4394	M	4	1	Non-Amp	1	1	-0.390703	Unchange
NB095	460	M	1	0	Non-Amp	0	0	-0.203818	Unchange
NB096	465	F	1	0	Non-Amp	0	0	0.613801	Unchange
NB097	529	F	1	0	Non-Amp	0	0	-0.2739	Unchange
NB098	545	M	1	0	Non-Amp	0	0	0.520359	Unchange
NB099	0	M	1	0	Non-Amp	0	0	-0.437424	Unchange
NB100	218	M	1	0	Non-Amp	0	0	-0.320621	Unchange
NB101	425	M	1	0	Non-Amp	0	0	-1.46529	Down
NB102	544	M	1	0	Non-Amp	0	0	0.286753	Unchange
NB103	758	F	1	0	Non-Amp	0	1	-1.44193	Down
NB104	272	M	1	0	Non-Amp	0	0	-1.1616	Unchange
NB105	887	F	1	0	Non-Amp	0	0	-0.157097	Unchange
NB106	262	M	1	0	Non-Amp	0	1	-0.157097	Unchange
NB107	427	F	1	0	Non-Amp	0	0	-1.58209	Down
NB108	371	M	4	0	Non-Amp	0	0	-0.227179	Unchange
NB109	101	M	1	0	Non-Amp	0	1	0.0765081	Unchange
NB110	92	M	1	0	Non-Amp	0	0	-0.974717	Unchange
NB111	41	F	1	0	Non-Amp	0	0	0.56708	Unchange
NB112	734	F	1	0	NA	0	0	-0.717751	Unchange
NB113	451	M	1	1	Amp	0	1	0.403556	Unchange
NB114	465	M	1	0	Non-Amp	0	0	-0.0870157	Unchange
NB115	417	M	2b	0	Non-Amp	0	0	0.403556	Unchange
NB116	301	F	2a	0	Non-Amp	0	0	-0.180458	Unchange
NB117	206	F	2a	0	Non-Amp	0	1	-0.343982	Unchange
NB118	256	M	2a	0	Non-Amp	0	0	-0.460784	Unchange
NB119	207	F	2b	0	Non-Amp	1	1	-0.741111	Unchange
NB120	228	M	2b	0	Non-Amp	0	0	-0.554227	Unchange
NB121	121	M	2a	0	Non-Amp	0	0	-0.530866	Unchange
NB122	4562	F	2b	0	Non-Amp	1	1	0.59044	Unchange
NB123	151	M	2b	0	Non-Amp	0	0	0.286753	Unchange
NB124	240	M	2a	0	Non-Amp	0	1	0.426916	Unchange
NB125	9	F	2	0	Non-Amp	0	0	-0.647669	Unchange
NB126	0	F	2a	0	Non-Amp	0	0	-0.717751	Unchange
NB127	144	F	3	0	Non-Amp	0	0	-0.460784	Unchange
NB128	222	M	3	0	Non-Amp	0	0	-0.133737	Unchange
NB129	1701	M	3	0	Non-Amp	0	0	-0.0169341	Unchange
NB130	47	M	3	0	Non-Amp	0	1	-0.717751	Unchange
NB131	2	M	3	0	Non-Amp	0	0	-0.203818	Unchange
NB132	1071	M	3	0	Non-Amp	0	0	-0.0402946	Unchange
NB133	521	F	4	0	Non-Amp	0	1	0.0998687	Unchange
NB134	0	M	3	0	Non-Amp	0	0	1.15109	Unchange
NB135	526	M	3	0	Non-Amp	0	0	0.380195	Unchange
NB136	1679	M	3	1	Amp	1	1	0.356835	Unchange
NB137	1017	M	3	1	Amp	1	1	0.964209	Unchange
NB138	823	M	3	1	Amp	0	0	1.29126	Up
NB139	181	F	1	0	Non-Amp	0	0	-1.34849	Down
NB140	8983	F	4	1	Non-Amp	1	1	0.356835	Unchange
NB141	228	M	3	0	Non-Amp	0	0	-0.0169341	Unchange
NB142	426	F	3	0	Non-Amp	0	0	0.123229	Unchange
NB143	1085	F	4	1	Non-Amp	0	0	-0.297261	Unchange
NB144	1141	M	4	1	Non-Amp	0	0	0.543719	Unchange
NB145	356	M	2b	0	Non-Amp	0	0	-0.2739	Unchange
NB146	108	M	2a	0	Non-Amp	0	0	0.613801	Unchange
NB147	134	M	2a	0	Non-Amp	0	0	0.310114	Unchange
NB148	13	M	3	0	Non-Amp	0	0	0.917488	Unchange
NB149	666	F	2a	0	Non-Amp	1	1	1.05765	Unchange
NB150	181	F	3	0	Non-Amp	0	0	-0.834553	Unchange
NB151	1099	F	2b	0	Non-Amp	0	0	-1.58209	Down
NB152	37	M	1	0	Non-Amp	0	0	0.450277	Unchange
NB153	2041	F	1	0	Non-Amp	0	0	-0.367342	Unchange
NB154	82	M	1	0	Non-Amp	0	0	-0.530866	Unchange
NB155	63	M	1	0	Non-Amp	0	0	-0.787832	Unchange
NB156	49	M	1	0	Non-Amp	0	0	-0.951356	Unchange
NB157	460	M	1	0	Non-Amp	0	0	0.520359	Unchange
NB158	23	F	1	0	Non-Amp	0	0	0.216671	Unchange
NB159	933	F	1	0	Non-Amp	0	0	-1.62881	Down
NB160	356	M	1	0	Non-Amp	0	0	-0.927995	Unchange
NB161	56	F	1	0	Non-Amp	0	0	0.263393	Unchange
NB162	700	F	1	0	Non-Amp	0	0	-0.600948	Unchange
NB163	20	M	1	0	Non-Amp	0	0	1.01093	Unchange
NB164	267	M	1	0	Non-Amp	0	0	-1.18496	Unchange
NB165	262	F	1	0	Non-Amp	0	0	-0.484145	Unchange
NB166	103	M	1	0	Non-Amp	0	0	-0.180458	Unchange
NB167	315	M	1	0	Non-Amp	0	0	-1.58209	Down
NB168	90	F	1	0	Non-Amp	0	0	-0.2739	Unchange
NB169	4131	M	1	1	Amp	1	1	-0.554227	Unchange
NB170	6	M	2a	0	Non-Amp	0	1	-0.647669	Unchange
NB171	7	M	2b	0	Non-Amp	0	0	-0.414063	Unchange
NB172	502	M	1	0	Non-Amp	0	0	-2.11938	Down
NB173	374	F	2a	0	Non-Amp	0	1	0.029787	Unchange
NB174	429	M	2a	0	Non-Amp	0	0	-0.25054	Unchange
NB175	134	F	4S	1	Amp	0	0	-1.76898	Down
NB176	363	M	2a	0	Non-Amp	0	0	-0.133737	Unchange
NB177	0	F	2a	0	Non-Amp	0	1	-0.0169341	Unchange
NB178	0	M	2b	0	Non-Amp	0	0	0.123229	Unchange
NB179	42	M	2a	0	Non-Amp	0	1	-0.25054	Unchange
NB180	890	F	2a	0	Non-Amp	0	0	-0.390703	Unchange
NB181	3	M	2a	0	Non-Amp	0	1	-0.297261	Unchange
NB182	217	M	2b	0	Non-Amp	0	0	-0.25054	Unchange
NB183	1676	M	2b	0	Non-Amp	0	0	-0.857914	Unchange
NB184	370	M	2b	0	Non-Amp	0	0	0.800685	Unchange
NB185	300	F	2a	0	Non-Amp	0	0	-1.25504	Down
NB186	121	F	3	0	Non-Amp	0	1	0.380195	Unchange
NB187	1683	M	3	0	Non-Amp	0	0	-2.21283	Down
NB188	1057	F	3	0	Non-Amp	1	1	-0.647669	Unchange
NB189	448	M	3	0	NA	0	1	0.240032	Unchange
NB190	1408	M	3	0	Non-Amp	1	1	-0.0402946	Unchange
NB191	227	F	3	0	Non-Amp	0	1	0.426916	Unchange
NB192	1004	M	3	0	Non-Amp	1	1	-1.32512	Down
NB193	385	F	3	0	Non-Amp	0	0	0.310114	Unchange
NB194	767	F	3	1	Amp	1	1	1.54822	Up
NB195	1081	F	3	1	Amp	1	1	1.36134	Up
NB196	571	M	3	1	Amp	0	0	0.123229	Unchange
NB197	310	F	3	1	Amp	1	1	1.43142	Up
NB198	423	F	3	1	Amp	1	1	1.71175	Up
NB199	186	M	1	0	Non-Amp	0	0	0.0998687	Unchange
NB200	75	M	1	0	Non-Amp	0	0	-0.857914	Unchange
NB201	98	M	1	0	Non-Amp	0	0	-0.834553	Unchange
NB202	23	M	1	0	Non-Amp	0	0	0.543719	Unchange
NB203	101	M	1	0	Non-Amp	0	0	-0.974717	Unchange
NB204	18	F	1	0	Non-Amp	0	0	0.123229	Unchange
NB205	165	M	1	0	Non-Amp	0	0	1.78183	Up
NB206	35	M	1	0	Non-Amp	0	0	-1.2784	Down
NB207	118	F	1	0	Non-Amp	0	0	-3.12389	Down
NB208	29	F	1	0	Non-Amp	0	0	-0.811193	Unchange
NB209	226	F	1	0	Non-Amp	0	0	-0.203818	Unchange
NB210	204	M	1	0	Non-Amp	0	0	-0.484145	Unchange
NB211	11	M	1	0	Non-Amp	0	0	-0.881274	Unchange
NB212	0	M	2b	0	Non-Amp	0	1	0.730604	Unchange
NB213	560	M	1	0	Non-Amp	0	0	-0.484145	Unchange
NB214	437	F	1	0	Non-Amp	0	0	-1.25504	Down
NB215	98	M	1	0	Non-Amp	0	0	-0.0402946	Unchange
NB216	262	M	1	0	Non-Amp	0	0	-0.133737	Unchange
NB217	129	M	2b	0	Non-Amp	0	0	-1.11488	Unchange
NB218	8	M	2a	0	Non-Amp	0	0	-0.0636552	Unchange
NB219	2	M	2a	0	Non-Amp	0	0	-0.974717	Unchange
NB220	0	F	2a	0	Non-Amp	0	0	-0.741111	Unchange
NB221	1841	M	2a	0	Non-Amp	0	0	-2.75012	Down
NB222	2225	F	2b	0	Non-Amp	0	1	-0.437424	Unchange
NB223	28	F	3	0	Non-Amp	0	1	-0.0870157	Unchange
NB224	8926	F	1	0	Non-Amp	0	1	-2.96036	Down
NB225	84	M	2a	0	Non-Amp	0	0	-1.32512	Down
NB226	680	M	2b	0	Non-Amp	0	0	-0.998077	Unchange
NB227	87	M	2a	0	Non-Amp	0	1	0.380195	Unchange
NB228	170	F	2a	0	Non-Amp	0	0	0.029787	Unchange
NB229	218	F	3	0	Non-Amp	0	0	-1.06816	Unchange
NB230	9	M	3	0	Non-Amp	0	0	0.286753	Unchange
NB231	279	M	3	0	Non-Amp	0	1	-0.927995	Unchange
NB232	49	F	3	0	Non-Amp	0	1	1.01093	Unchange
NB233	152	M	3	0	Non-Amp	0	1	-2.18947	Down
NB234	0	F	3	0	Non-Amp	0	1	-1.97922	Down
NB235	352	F	4	0	Non-Amp	0	1	0.240032	Unchange
NB236	1742	M	3	1	Amp	0	0	-0.203818	Unchange
NB237	1798	F	1	0	Non-Amp	0	0	-1.18496	Unchange
NB238	386	M	4	0	Non-Amp	0	0	-1.25504	Down
NB239	1909	M	4	1	Non-Amp	0	0	-1.69889	Down
NB240	215	F	4	0	Non-Amp	0	1	-0.69439	Unchange
NB241	1101	M	4	1	Non-Amp	0	0	-0.157097	Unchange
NB242	1841	F	4	1	Non-Amp	1	1	1.3847	Up
NB243	1640	M	4	1	Non-Amp	0	0	-0.857914	Unchange
NB244	724	M	4	1	Non-Amp	1	1	-2.56323	Down
NB245	1319	M	4	1	Non-Amp	1	1	-1.90914	Down
NB246	2324	M	4	1	Non-Amp	0	1	0.0998687	Unchange
NB247	1267	M	4	1	Non-Amp	0	1	-0.110376	Unchange
NB248	1273	M	4	1	Non-Amp	0	0	0.637161	Unchange
NB249	1590	M	4	1	Non-Amp	0	0	-1.23168	Unchange
NB250	1529	F	4	1	Non-Amp	1	1	-0.25054	Unchange
NB251	1486	M	4	1	Non-Amp	0	0	-0.904635	Unchange
NB252	658	F	4	1	Non-Amp	1	1	0.753964	Unchange
NB253	247	F	4	0	Non-Amp	0	0	0.940848	Unchange
NB254	219	M	4	1	Amp	0	0	0.98757	Unchange
NB255	982	M	4	1	NA	1	1	0.613801	Unchange
NB256	279	F	4	1	Amp	1	1	1.17445	Unchange
NB257	1964	F	4	1	Amp	1	1	2.1556	Up
NB258	3749	F	4	1	Amp	0	0	1.3847	Up
NB259	517	F	4	1	Amp	1	1	1.31462	Up
NB260	710	F	4	1	Amp	0	0	0.753964	Unchange
NB261	1029	M	4	1	Amp	0	0	-0.320621	Unchange
NB262	633	F	4	1	Amp	1	1	1.3847	Up
NB263	8278	F	4	1	Amp	1	1	0.16995	Unchange
NB264	2105	F	4	1	Amp	1	1	0.240032	Unchange
NB265	769	M	4	1	Amp	0	0	0.426916	Unchange
NB266	880	F	4	1	Amp	0	0	0.14659	Unchange
NB267	978	F	4	1	Amp	1	1	0.847406	Unchange
NB268	3842	M	4	1	Amp	1	1	1.10437	Unchange
NB269	583	F	4	1	Amp	1	1	0.683882	Unchange
NB270	121	M	4	1	Amp	1	1	0.964209	Unchange
NB271	589	M	4	1	Amp	1	1	1.2679	Up
NB272	1174	M	4	1	Amp	0	1	1.59494	Up
NB273	165	M	4S	0	Non-Amp	0	1	-0.133737	Unchange
NB274	35	F	4S	0	Non-Amp	0	0	-1.1616	Unchange
NB275	52	F	4S	0	Non-Amp	0	0	-0.834553	Unchange
NB276	12	M	4S	0	Non-Amp	0	0	-0.180458	Unchange
NB277	194	F	4S	0	Non-Amp	0	0	0.520359	Unchange
NB278	121	M	4S	0	Non-Amp	0	0	1.80519	Up
NB279	66	M	4S	0	Non-Amp	0	0	0.029787	Unchange
NB280	193	F	4S	0	Non-Amp	0	0	-1.11488	Unchange
NB281	0	M	4S	0	Non-Amp	0	0	-1.48865	Down
NB282	202	M	4S	0	Non-Amp	0	1	1.47814	Up
NB283	118	M	4S	0	Non-Amp	0	0	0.123229	Unchange
NB284	10	M	4S	0	Non-Amp	0	1	1.82855	Up
NB285	79	M	4S	0	Non-Amp	0	0	-0.203818	Unchange
NB286	3	M	4S	0	Non-Amp	0	0	0.0531476	Unchange
NB287	50	F	4S	0	Non-Amp	1	1	0.660522	Unchange
NB288	93	F	4S	0	Non-Amp	0	0	-0.460784	Unchange
NB289	144	F	4S	0	Non-Amp	1	1	-0.0870157	Unchange
NB290	139	M	4S	0	Non-Amp	0	0	0.543719	Unchange
NB291	128	F	4S	0	Non-Amp	0	0	-1.02144	Unchange
NB292	75	M	4S	0	Non-Amp	0	0	0.0998687	Unchange
NB293	21	M	4S	0	Non-Amp	0	0	-0.69439	Unchange
NB294	121	F	4S	0	Non-Amp	0	0	-0.0870157	Unchange
NB295	146	F	4S	0	Non-Amp	0	1	-1.1616	Unchange
NB296	69	M	4S	0	Non-Amp	0	0	-0.904635	Unchange
NB297	305	M	4S	0	Non-Amp	0	1	-0.974717	Unchange
NB298	180	F	4S	0	Non-Amp	0	0	-1.06816	Unchange
NB299	263	M	4S	0	Non-Amp	0	0	-1.23168	Unchange
NB300	11	M	4S	0	Non-Amp	0	1	-0.671029	Unchange
NB301	313	M	4S	0	Non-Amp	0	0	-0.0870157	Unchange
NB302	105	F	4	0	Non-Amp	0	1	1.12773	Unchange
NB303	443	M	1	0	Non-Amp	0	0	-0.227179	Unchange
NB304	3	M	4S	0	Non-Amp	0	0	0.216671	Unchange
NB305	12	F	4S	0	Non-Amp	1	1	1.5015	Up
NB306	16	F	4S	0	Non-Amp	0	0	-0.717751	Unchange
NB307	121	F	4S	0	Non-Amp	0	0	0.426916	Unchange
NB308	143	F	4S	0	Non-Amp	0	0	1.33798	Up
NB309	3	M	4S	0	Non-Amp	0	1	-0.367342	Unchange
NB310	116	M	4S	0	Non-Amp	0	0	1.29126	Up
NB311	0	F	4S	0	Non-Amp	0	1	2.20232	Up
NB312	97	M	4S	0	NA	0	0	-0.811193	Unchange
NB313	92	M	4S	1	Amp	0	0	1.15109	Unchange
NB314	196	M	4	1	Amp	1	1	-0.577587	Unchange
NB315	14	M	2a	0	Non-Amp	0	0	0.637161	Unchange
NB316	85	M	4S	1	Amp	1	1	-1.39521	Down
NB317	732	F	2	0	Non-Amp	0	0	-1.58209	Down
NB318	300	F	1	0	Non-Amp	0	0	0.310114	Unchange
NB319	357	M	4	1	Amp	1	1	1.19781	Unchange
NB320	1113	M	4	1	Non-Amp	1	1	-0.110376	Unchange
NB321	870	M	4	1	Amp	1	1	1.24454	Unchange
NB322	1611	M	4	1	Amp	1	1	-2.44643	Down
NB323	450	M	4	0	Non-Amp	1	1	0.333474	Unchange
NB324	120	M	1	0	Non-Amp	0	0	-0.530866	Unchange
NB325	360	M	1	0	Non-Amp	0	0	-1.37185	Down
NB326	3240	F	4	1	Amp	1	1	1.03429	Unchange
NB327	690	M	2	1	Amp	1	1	-1.25504	Down
NB328	1560	F	4	1	Amp	1	1	2.22568	Up
NB329	387	M	4	0	Non-Amp	0	0	0.56708	Unchange
NB330	516	M	4	0	Non-Amp	0	0	-1.20832	Unchange
NB331	1676	M	4	1	Amp	1	1	0.847406	Unchange
NB332	549	M	4	1	Non-Amp	0	0	2.87977	Up
NB333	1545	M	4	1	Non-Amp	1	1	0.286753	Unchange
NB334	432	F	4	0	Non-Amp	0	0	1.31462	Up
NB335	1764	F	4	1	Non-Amp	1	1	1.2679	Up
NB336	1067	M	4	1	Amp	0	1	1.3847	Up
NB337	1968	M	4	1	Non-Amp	1	1	-0.110376	Unchange
NB338	1413	F	4	1	Amp	0	0	1.33798	Up
NB339	714.6	F	4	1	Amp	1	1	0.613801	Unchange
NB340	300	F	1	0	Non-Amp	0	0	0.0765081	Unchange
NB341	750	M	4	1	Non-Amp	0	1	0.380195	Unchange
NB342	210	F	1	0	Non-Amp	0	0	0.613801	Unchange
NB343	300	F	1	0	Non-Amp	0	0	0.193311	Unchange
NB344	300	M	1	0	Non-Amp	0	0	-0.367342	Unchange
NB345	240	M	1	0	Non-Amp	0	0	0.0531476	Unchange
NB346	310	F	1	0	Non-Amp	0	0	0.496998	Unchange
NB347	60	F	1	0	Non-Amp	0	0	0.0765081	Unchange
NB348	47	M	1	0	Non-Amp	0	0	0.56708	Unchange
NB349	270	F	3	0	Non-Amp	0	0	1.01093	Unchange
NB350	271	F	3	0	Non-Amp	0	0	-0.227179	Unchange
NB351	1290	M	4	1	Non-Amp	0	0	1.10437	Unchange
NB352	1050	M	4	1	Non-Amp	0	0	-1.20832	Unchange
NB353	1200	M	3	0	Non-Amp	1	1	0.356835	Unchange
NB354	267	F	4	0	Non-Amp	1	1	1.03429	Unchange
NB355	0	M	1	0	Non-Amp	0	0	-1.09152	Unchange
NB356	1074	M	2a	0	Non-Amp	0	0	-0.69439	Unchange
NB357	364	F	3	0	Non-Amp	0	1	-0.180458	Unchange
NB358	304	F	3	0	Non-Amp	0	1	-0.414063	Unchange
NB359	1570	M	4	1	Non-Amp	1	1	-0.437424	Unchange
NB360	2135	M	4	1	Non-Amp	1	1	-0.227179	Unchange
NB361	416	M	4	0	NA	0	1	0.520359	Unchange
NB362	641	M	4	1	Amp	1	1	-1.58209	Down
NB363	49	M	4S	0	Non-Amp	0	0	-1.18496	Unchange
NB364	8	M	4S	0	Non-Amp	0	0	0.356835	Unchange
NB365	80	M	4S	0	Non-Amp	0	0	-0.460784	Unchange
NB366	0	M	4S	0	Non-Amp	0	0	-0.343982	Unchange
NB367	56	F	1	0	Non-Amp	0	0	-0.343982	Unchange
NB368	58	F	1	0	Non-Amp	0	0	0.917488	Unchange
NB369	1132	M	4	1	Non-Amp	1	1	1.5015	Up
NB370	216	M	1	0	Non-Amp	0	0	0.403556	Unchange
NB371	1488	F	4	1	Non-Amp	1	1	0.613801	Unchange
NB372	1890	M	4	1	Non-Amp	0	1	0.029787	Unchange
NB373	489	F	4	1	Amp	1	1	0.800685	Unchange
NB374	1024	M	4	1	Non-Amp	0	1	2.03879	Up
NB375	924	M	4	1	Non-Amp	1	1	1.96871	Up
NB376	1071	M	4	1	Non-Amp	1	1	-0.530866	Unchange
NB377	1437	M	4	1	Non-Amp	1	1	0.707243	Unchange
NB378	3072	F	4	1	Amp	1	1	0.683882	Unchange
NB379	810	M	4	1	Non-Amp	0	0	1.80519	Up
NB380	21	F	4	0	Non-Amp	0	0	2.76297	Up
NB381	633	F	4	1	Amp	1	1	1.78183	Up
NB382	660	F	2	0	Non-Amp	0	0	-0.577587	Unchange
NB383	1904	M	4	1	Amp	1	1	0.870767	Unchange
NB384	1424	F	4	1	Non-Amp	1	1	0.917488	Unchange
NB385	2544	F	4	1	Non-Amp	1	1	-0.227179	Unchange
NB386	2264	F	4	1	Non-Amp	1	1	-0.414063	Unchange
NB387	431	M	4	0	Non-Amp	0	0	-1.67553	Down
NB388	1363	M	4	1	Non-Amp	1	1	0.59044	Unchange
NB389	660	M	4	1	Amp	0	0	0.0998687	Unchange
NB390	822	F	4	1	Non-Amp	1	1	2.57609	Up
NB391	1644	M	4	1	Non-Amp	0	0	-1.39521	Down
NB392	1282	M	4	1	Non-Amp	1	1	-0.0169341	Unchange
NB393	1537	M	4	1	Non-Amp	1	1	-0.974717	Unchange
NB394	1524	M	4	1	Non-Amp	0	1	-1.51201	Down
NB395	2111	F	2a	0	Non-Amp	0	0	-2.51651	Down
NB396	1221	F	4	1	Non-Amp	1	1	-0.671029	Unchange
NB397	107	M	4S	0	Non-Amp	0	0	-0.741111	Unchange
NB398	227	M	4S	0	Non-Amp	0	1	-1.60545	Down
NB399	1215	M	4	1	Non-Amp	0	0	0.777325	Unchange
NB400	1812	M	4	1	Non-Amp	0	1	-1.32512	Down
NB401	1875	M	4	1	Non-Amp	0	1	1.73511	Up
NB402	1325	F	4	1	Non-Amp	0	1	1.08101	Unchange
NB403	447	M	4	1	Amp	1	1	0.0531476	Unchange
NB404	529	F	4	1	Amp	1	1	0.263393	Unchange
NB405	2338	M	4	1	Amp	0	0	0.637161	Unchange
NB406	1053	F	4	1	Amp	1	1	0.56708	Unchange
NB407	1272	M	3	1	Amp	1	1	1.59494	Up
NB408	907	M	4	1	Amp	1	1	-0.834553	Unchange
NB409	827	M	4	1	Non-Amp	0	0	-0.343982	Unchange
NB410	2621	F	4	1	Non-Amp	0	0	1.40806	Up
NB411	2186	F	4	1	Non-Amp	0	1	-0.133737	Unchange
NB412	1553	M	4	1	Non-Amp	0	1	-1.83906	Down
NB413	1431	F	4	1	Amp	0	0	1.82855	Up
NB414	989	M	4	1	Amp	1	1	-0.157097	Unchange
NB415	849	F	4	1	Amp	0	1	3.13674	Up
NB416	5225	M	2b	0	Non-Amp	0	1	-0.741111	Unchange
NB417	235	M	4S	0	Non-Amp	0	0	0.0531476	Unchange
NB418	1383	M	4	1	Non-Amp	0	0	0.59044	Unchange
NB419	133	F	2b	0	Non-Amp	0	0	-1.13824	Unchange
NB420	3488	F	1	0	Non-Amp	0	0	-0.180458	Unchange
NB421	87	M	4S	0	Non-Amp	0	0	0.426916	Unchange
NB422	1708	M	4	1	Non-Amp	0	1	-0.157097	Unchange
NB423	207	M	4	0	Non-Amp	0	1	-0.717751	Unchange
NB424	533	F	4	1	Amp	0	0	0.426916	Unchange
NB425	227	M	4	0	Non-Amp	0	0	-0.600948	Unchange
NB426	1010	M	4	1	Non-Amp	0	0	1.01093	Unchange
NB427	214	M	4	0	Non-Amp	0	0	-1.06816	Unchange
NB428	441	M	4	1	Amp	0	0	0.520359	Unchange
NB429	236	F	4	0	Non-Amp	0	0	-2.11938	Down
NB430	837	M	4	1	Amp	0	1	-3.28741	Down
NB431	448	F	4	1	Amp	0	0	0.0765081	Unchange
NB432	582	F	4	1	Amp	0	0	-0.927995	Unchange
NB433	343	F	4	0	Non-Amp	0	0	-0.414063	Unchange
NB434	309	M	4	0	Non-Amp	0	0	0.777325	Unchange
NB435	282	F	4	0	Non-Amp	0	0	1.82855	Up
NB436	972	M	4	1	Non-Amp	0	0	1.17445	Unchange
NB437	792	F	4	1	Amp	1	1	2.71625	Up
NB438	936	M	4	1	Amp	1	1	2.13224	Up
NB439	3636	M	4	1	Non-Amp	1	1	1.87527	Up
NB440	3189	M	4	1	Non-Amp	1	1	1.29126	Up
NB441	435	M	4	0	Non-Amp	0	0	0.310114	Unchange
NB442	1026	F	4	1	Non-Amp	1	1	1.3847	Up
NB443	935.4	F	4	1	Amp	1	1	1.5015	Up
NB444	1547	M	4	1	Amp	1	1	0.894127	Unchange
NB445	1113	M	4	1	Non-Amp	1	1	1.10437	Unchange
NB446	1404	M	4	1	Non-Amp	1	1	0.520359	Unchange
NB447	1275	M	4	1	Non-Amp	1	1	0.356835	Unchange
NB448	1573	F	4	1	Non-Amp	0	1	0.240032	Unchange
NB449	521	F	4	1	Amp	0	0	2.52937	Up
NB450	360	M	2	0	Non-Amp	0	0	0.193311	Unchange
NB451	330	M	2	0	Non-Amp	0	0	0.16995	Unchange
NB452	240	F	1	0	Non-Amp	0	0	0.894127	Unchange
NB453	30	M	2	0	Non-Amp	0	0	0.683882	Unchange
NB454	711	M	4	1	Non-Amp	1	1	0.216671	Unchange
NB455	519	M	4	0	Non-Amp	0	0	1.10437	Unchange
NB456	410	M	4	1	Amp	1	1	1.66503	Up
NB457	960	M	4	1	Amp	1	1	1.57158	Up
NB458	1931	F	4	1	Non-Amp	1	1	-0.25054	Unchange
NB459	34	M	1	1	Amp	0	0	0.613801	Unchange
NB460	112	F	2a	1	Amp	0	1	1.78183	Up
NB461	267	M	4	1	Amp	0	0	0.824046	Unchange
NB462	166	F	4	0	Non-Amp	0	0	-0.0169341	Unchange
NB463	0	F	1	0	Non-Amp	0	1	1.24454	Unchange
NB464	1289	M	4	1	Non-Amp	1	1	-0.157097	Unchange
NB465	137	F	4	1	Amp	0	0	2.55273	Up
NB466	1443	F	4	1	Non-Amp	0	1	0.59044	Unchange
NB467	2786	M	4	1	Non-Amp	0	0	1.5015	Up
NB468	456	M	4	0	Non-Amp	0	1	1.43142	Up
NB469	1022	M	4	1	Amp	0	1	0.964209	Unchange
NB470	225	M	1	0	Non-Amp	0	0	-0.0169341	Unchange
NB471	25	F	1	0	Non-Amp	0	0	-0.320621	Unchange
NB472	245	F	1	0	Non-Amp	0	0	1.71175	Up
NB473	146	F	1	0	Non-Amp	0	0	-0.951356	Unchange
NB474	17	F	3	0	Non-Amp	0	1	0.496998	Unchange
NB475	1575	M	4	1	Amp	1	1	0.870767	Unchange
NB476	860	F	3	0	Non-Amp	0	0	-1.55873	Down
NB477	323	M	3	0	Non-Amp	0	0	-0.297261	Unchange
NB478	1468	M	4	1	Non-Amp	0	0	-1.09152	Unchange
NB479	1516	F	1	0	Non-Amp	0	0	-1.44193	Down
NB480	1897	M	4	1	Non-Amp	0	0	-0.764472	Unchange
NB481	2045	M	4	1	Amp	0	0	0.496998	Unchange
NB482	465	M	4	0	Non-Amp	0	0	-0.297261	Unchange
NB483	259	F	1	0	Non-Amp	0	1	0.847406	Unchange
NB484	1546	F	2a	1	Amp	0	0	0.123229	Unchange
NB485	712	F	3	1	Amp	0	0	-0.25054	Unchange
NB486	478	M	2a	1	Amp	0	1	0.426916	Unchange
NB487	162	M	4	1	Amp	0	0	0.683882	Unchange
NB488	212	F	4	0	Non-Amp	0	0	0.940848	Unchange
NB489	865	F	4	1	Amp	0	0	-0.484145	Unchange
NB490	1759	F	4	1	Amp	0	1	-0.577587	Unchange
NB491	2326	M	4	1	Non-Amp	0	1	0.707243	Unchange
NB492	947	M	4	1	Amp	1	1	0.0998687	Unchange
NB493	190	M	1	0	Non-Amp	0	0	0.0998687	Unchange
NB494	56	M	1	0	Non-Amp	0	0	0.637161	Unchange
NB495	163	M	1	0	Non-Amp	0	0	0.707243	Unchange
NB496	132	M	1	0	Non-Amp	0	1	1.33798	Up
NB497	379	F	1	0	Non-Amp	0	0	0.123229	Unchange
NB498	530	F	1	0	Non-Amp	0	0	0.0531476	Unchange
